# Supplementary material for: Gravitational separation of Ar∕N 2 and age of air in the lowermost stratosphere in airborne observations and a chemical transport model
Source: Copernicus journal article supplement (doi:10.5194/acp-20-12391-2020), 2020-10-30
Supplement: Supplementary file 1 [file acp-20-12391-2020-supplement.zip]

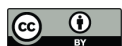

*Supplement of*

## **Gravitational separation of Ar / N<sub>2</sub> and age of air in the lowermost stratosphere in airborne observations and a chemical transport model**

**Benjamin Birner et al.**

*Correspondence to:* Benjamin Birner ([bbirner@ucsd.edu](mailto:bbirner@ucsd.edu))

- [acp-20-12391-2020-supplement-title-page.pdf](#)
- [dArN2\\_and\\_AOA\\_alt\\_zonalMean.avi](#)
- [paper\\_draft\\_SI\\_formated\\_submitted\\_v8.pdf](#)

The copyright of individual parts of the supplement might differ from the CC BY 4.0 License.
