# Supplementary material for: Gravitational separation of Ar∕N 2 and age of air in the lowermost stratosphere in airborne observations and a chemical transport model
Source: Copernicus journal article supplement (doi:10.5194/acp-20-12391-2020), 2020-10-30
Supplement: Supplementary file 3 [file acp-20-12391-2020-supplement.zip]

Archive with 3 entries (3 files):
- dArN2_and_AOA_alt_zonalMean.avi
- paper_draft_SI_formated_submitted_v8.pdf
- acp-20-12391-2020-supplement-title-page.pdf
